# Supplementary material for: Hollow bimetallic selenide derived from a hierarchical MOF-based Prussian blue analogue for urea electrolysis
Source: Royal Society of Chemistry journal article supplement (doi:10.1039/d1qi00230a), 2021-01-01
Supplement: d1qi00230a1.pdf [file d1qi00230a1.pdf]

**Hollow Bimetallic Selenide Derived from Hierarchical MOF-based Prussian  
Blue Analogue for Urea Electrolysis**

Huizhu Xu, Ke Ye\*, Kai Zhu, Yinyi Gao, Jinling Yin, Jun Yan, Guiling Wang,

Dianxue Cao\*

Key Laboratory of Superlight Materials and Surface Technology of Ministry of  
Education, College of Materials Science and Chemical Engineering, Harbin

Engineering University, Harbin 150001, China

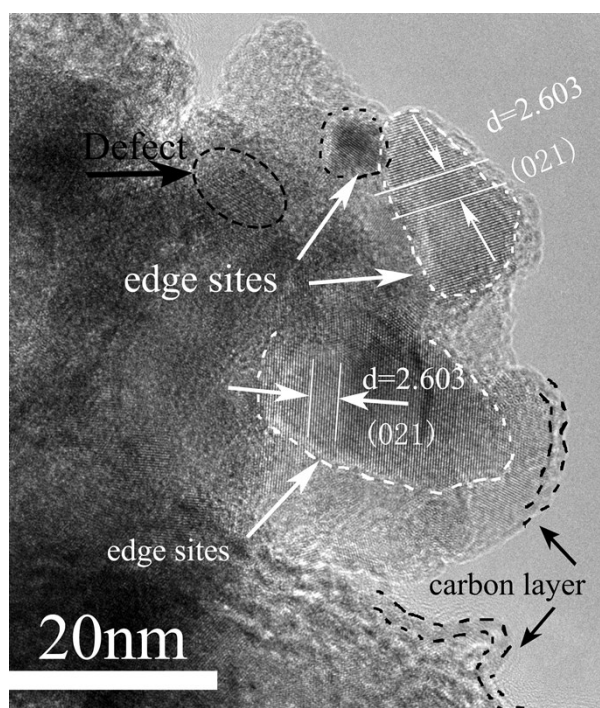

**Figure S1.** HRTEM image of PBA@MOF-Ni/Se.

\*Corresponding authors.

E-mail addresses: yekehrbeu@163.com (K. Ye); caodianxue@hrbeu.edu.cn (D. Cao)

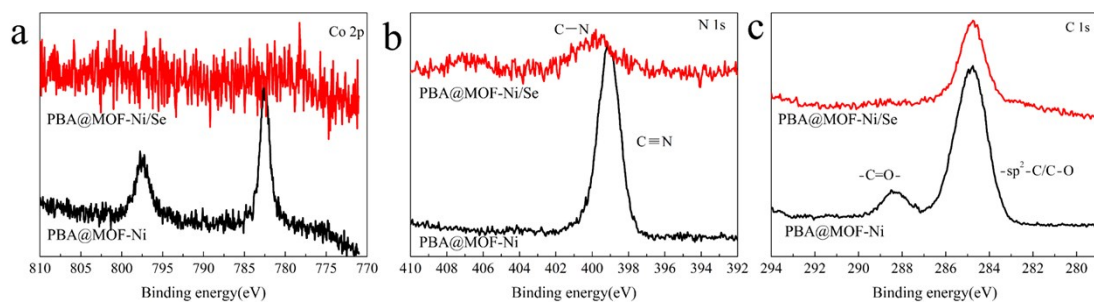

**Figure S2.** XPS spectra of (a) Co 2p; (b) N 1s; (c) C 1s of PBA@MOF-Ni and PBA@MOF-Ni/Se.

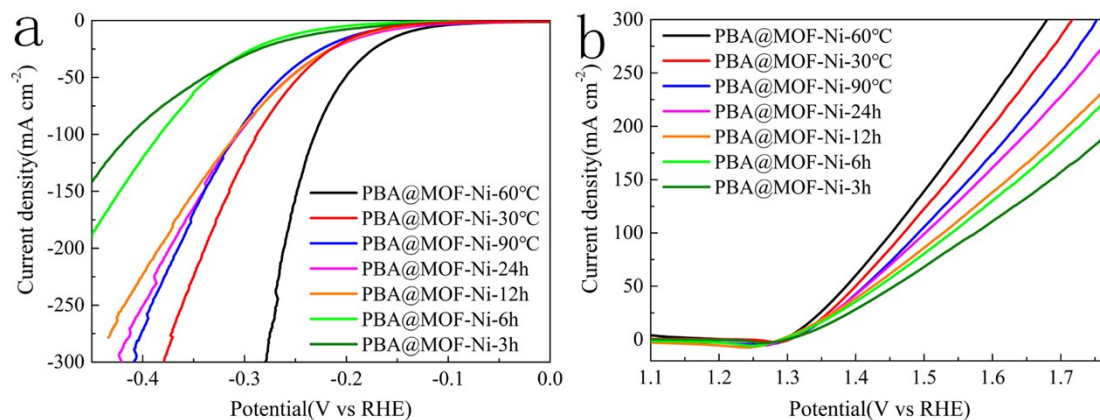

**Figure S3.** (a) Polarization curves of PBA@MOF-Ni/Se under different reaction conditions towards HER in 1.0 M KOH with 0.5 M urea; (b) Polarization curves of PBA@MOF-Ni/Se under different reaction conditions towards UOR in 1.0 M KOH with 0.5 M urea.

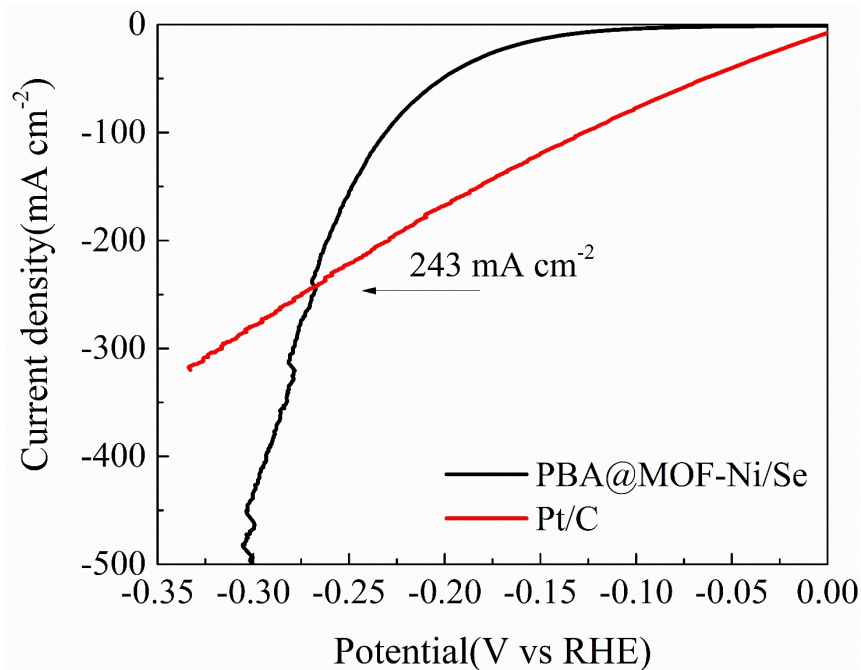

**Figure S4.** LSV curves towards HER of PBA@MOF-Ni/Se and commercial Pt/C.

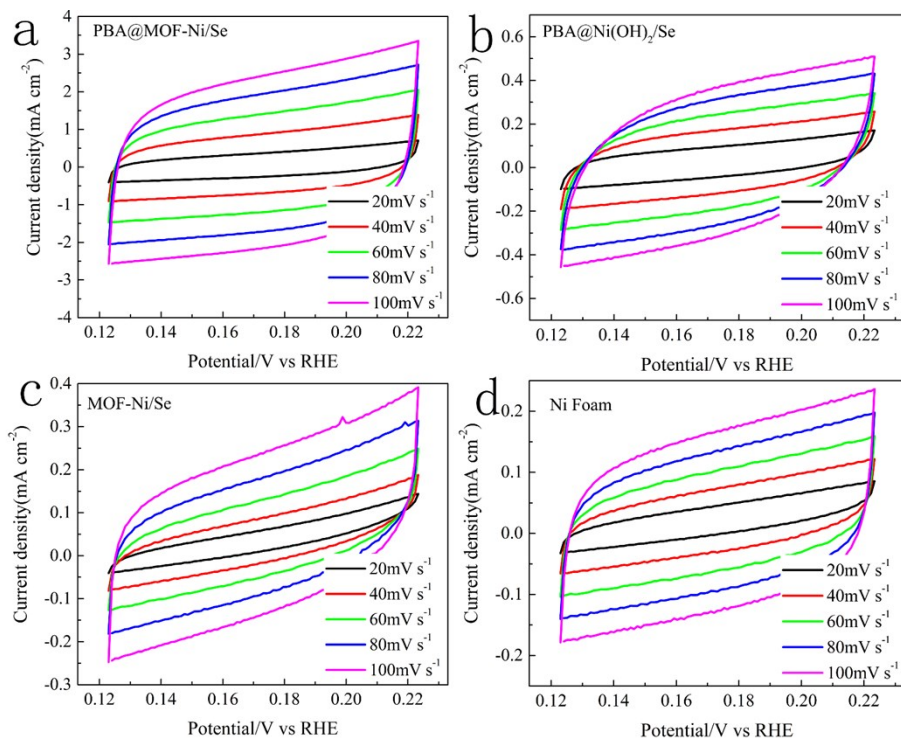

**Figure S5.** CV curves of (a) PBA@MOF-Ni/Se; (b) PBA@Ni(OH)<sub>2</sub>/Se; (c) MOF-Ni/Se; (d) Ni foam; (e) ECSA evaluation towards HER in 1.0 M KOH with 0.5 M urea.

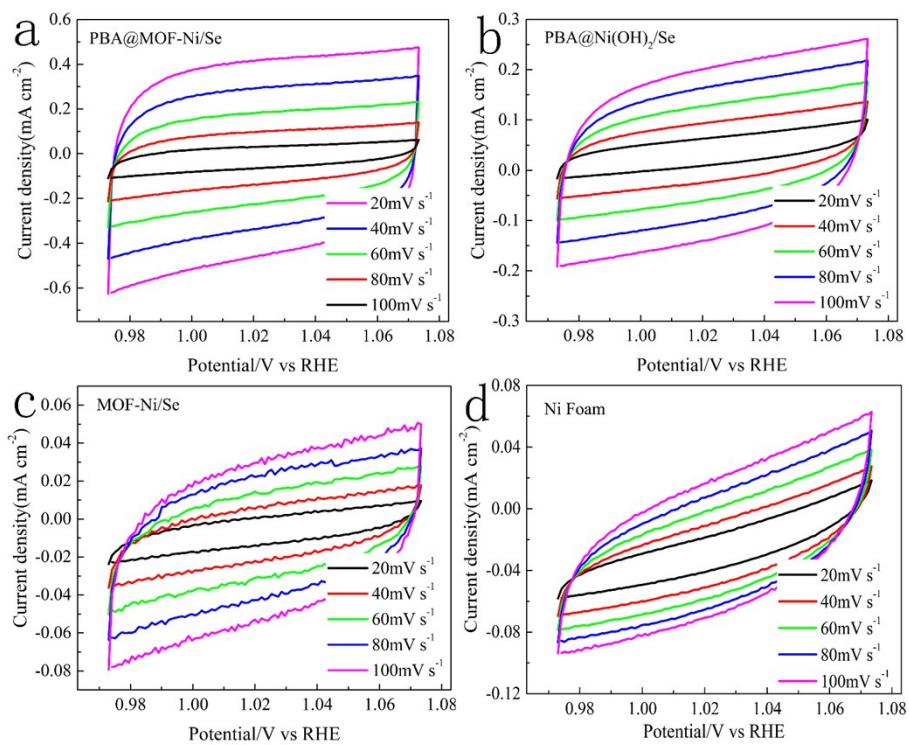

**Figure S6.** CV curves of (a) PBA@MOF-Ni/Se; (b) PBA@Ni(OH)<sub>2</sub>/Se; (c) MOF-Ni/Se; (d) Ni foam; (e) ECSA evaluation towards UOR in 1.0 M KOH with 0.5 M urea.

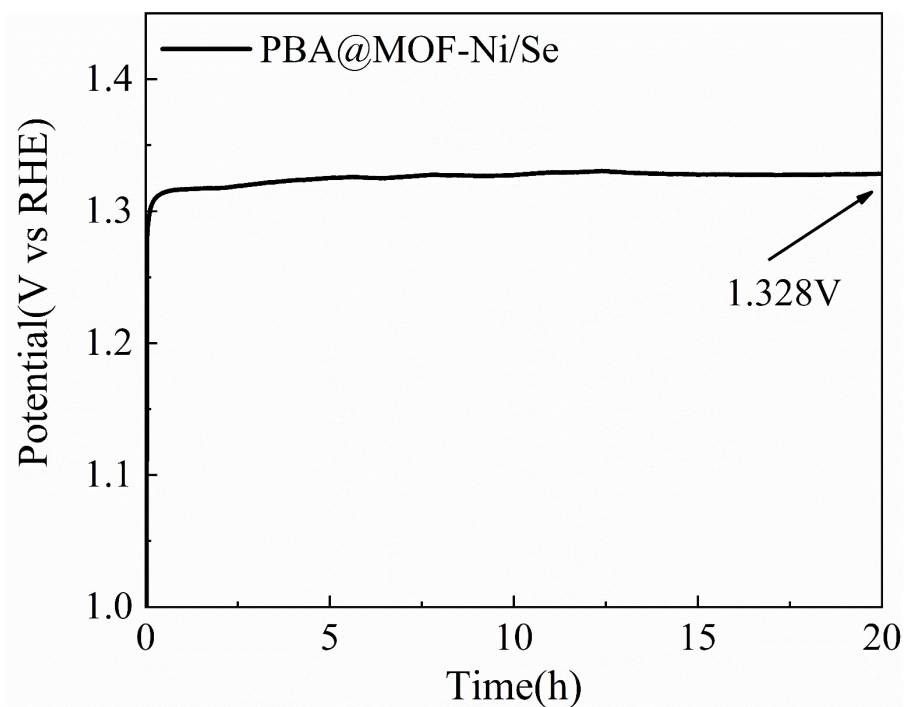

**Figure S7.** Chronopotentiometry curve of PBA@MOF-Ni/Se towards UOR at 10 mA  $\text{cm}^{-2}$  for 20h.

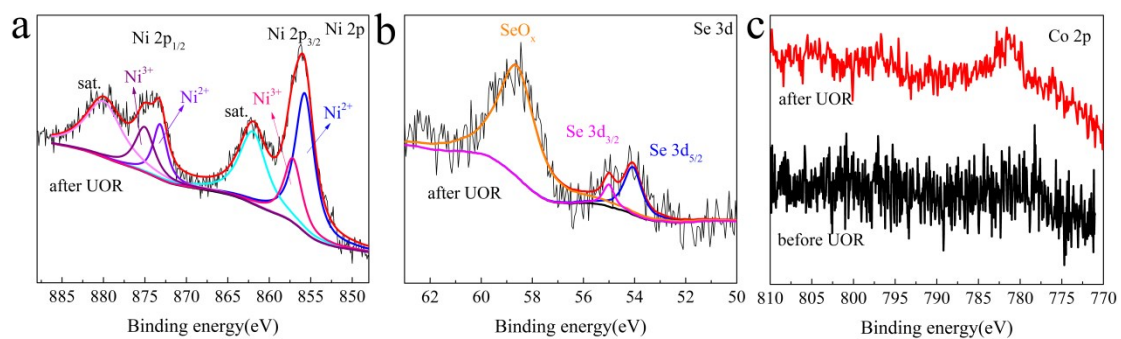

**Figure S8.** XPS spectra of (a) Ni 2p (b) Se 3d and (c) Co 2p of PBA@MOF-Ni/Se before and after UOR.

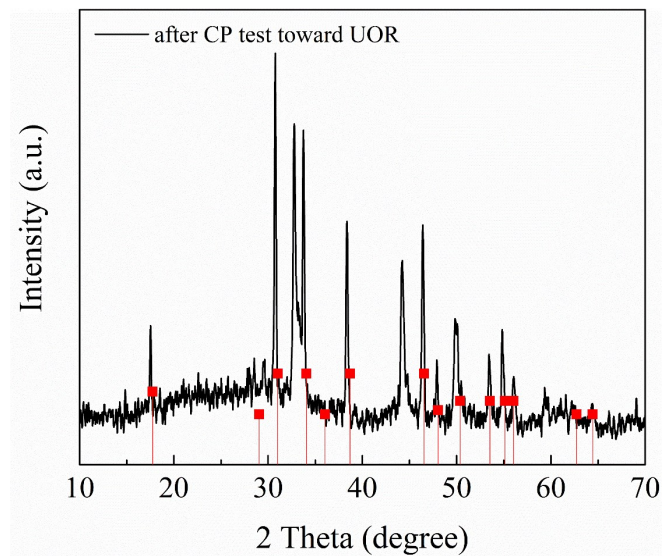

**Figure S9.** XRD pattern of PBA@MOF-Ni/Se after CP test towards UOR.

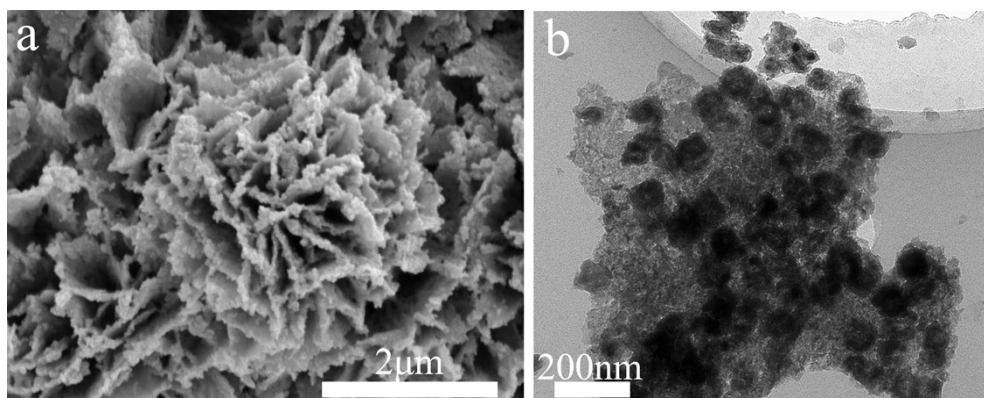

**Figure S10.** (a) SEM image of PBA@MOF-Ni/Se after CP test towards UOR; (b) TEM image of PBA@MOF-Ni/Se after CP test towards UOR.

**Table S1.** Comparison of the electrocatalytic activity of PBA@MOF-Ni/Se towards UOR in alkaline media with catalysts reported previously.

| Electrocatalysts                                   | Electrolyte           | Potential<br>(V vs. RHE)<br>at 10 mA cm <sup>-2</sup> | Ref       |
|----------------------------------------------------|-----------------------|-------------------------------------------------------|-----------|
| PBA@MOF-Ni/Se                                      | 1.0 M KOH 0.5 M Urea  | 1.319 V                                               | This work |
| CoS <sub>2</sub>                                   | 1.0 M KOH 0.3 M Urea  | 1.4 V                                                 | 1         |
| Ni <sub>2</sub> P/Fe <sub>2</sub> P                | 1.0 M KOH 0.5 M Urea  | 1.36 V                                                | 2         |
| Ni/NiO                                             | 1.0 M KOH 0.33 M Urea | 1.33 V                                                | 3         |
| MnO <sub>2</sub> /MnCo <sub>2</sub> O <sub>4</sub> | 1.0 M KOH 0.5 M Urea  | 1.33 V                                                | 4         |
| NiMoO <sub>4</sub> ·H <sub>2</sub> O               | 1.0 M KOH 0.5 M Urea  | 1.35 V                                                | 5         |
| Ni MOF                                             | 1.0 M KOH 1.0 M Urea  | 1.36 V                                                | 6         |

---

|                                              |                       |         |    |
|----------------------------------------------|-----------------------|---------|----|
| HC-NiMoS/Ti                                  | 1.0 M KOH 0.5 M Urea  | 1.38 V  | 7  |
| NF-G-Mn                                      | 1.0 M KOH 0.5 M Urea  | 1.33 V  | 8  |
| CoN NF/NF                                    | 1.0 M KOH 0.5 M Urea  | 1.342 V | 9  |
| Ni <sub>(10%)</sub> Pd <sub>(10%)</sub> /OMC | 1.0 M KOH 0.33 M Urea | 1.346 V | 10 |

---



**Table S2.** Comparison of the electrocatalytic performance of PBA@MOF-Ni/Se || PBA@MOF-Ni/Se towards overall urea electrolysis in alkaline media with catalysts reported previously.

| Catalyst                                           | Electrolyte          | Cell voltage<br>at 10 mA cm <sup>-2</sup> | Ref       |
|----------------------------------------------------|----------------------|-------------------------------------------|-----------|
| PBA@MOF-Ni/Se                                      | 1.0 M KOH 0.5 M Urea | 1.495 V                                   | This work |
| CoS <sub>2</sub>                                   | 1.0 M KOH 0.3 M Urea | 1.59 V                                    | 1         |
| MnO <sub>2</sub> /MnCo <sub>2</sub> O <sub>4</sub> | 1.0 M KOH 0.5 M Urea | 1.55 V                                    | 4         |
| HC-NiMoS/Ti                                        | 1.0 M KOH 0.5 M Urea | 1.59 V                                    | 7         |
| NF-Pt/C                                            | 1.0 M KOH 0.5 M Urea | 1.63 V                                    | 11        |
| NF-Pt/C   NF-IrO <sub>2</sub>                      | 1.0 M KOH 0.5 M Urea | 1.72 V                                    | 11        |
| NiMoS                                              | 1.0 M KOH 0.5 M Urea | 1.59 V                                    | 12        |

## References

- [1] S. Wei, X. Wang, J. Wang, X. Sun, L. Cui, W. Yang, Y. Zheng, J. Liu, CoS<sub>2</sub> nanoneedle array on Ti mesh: A stable and efficient bifunctional electrocatalyst for urea-assisted electrolytic hydrogen production, *Electrochim. Acta* 246 (2017) 776-782.
- [2] L. Yan, Y. Sun, E. Hu, J. Ning, Y. Zhong, Z. Zhang, Y. Hu, Facile in-situ growth of Ni<sub>2</sub>P/Fe<sub>2</sub>P nanohybrids on Ni foam for highly efficient urea electrolysis, *J. Colloid Interf. Sci.* 541 (2019) 279-286
- [3] B. Zhang, S. Wang, Z. Ma, Y. Qiu, Ni<sup>0</sup>-rich Ni/NiO nanocrystals for efficient water to hydrogen conversion via urea electro-oxidation, *App. Surf. Sci.* 496 (2019) 143710.
- [4] C. Xiao, S. Li, X. Zhang, D. R. MacFarlane, MnO<sub>2</sub>/MnCo<sub>2</sub>O<sub>4</sub>/Ni heterostructure with quadruple hierarchy: a bifunctional electrode architecture for overall urea oxidation, *J. Mater. Chem. A* 5(2017) 7825-7832.
- [5] Z. Yu, C. Lang, M. Gao, Y. Chen, Q. Fu, Y. Duan, S. Yu, Ni–Mo–O nanorod-derived composite catalysts for efficient alkaline water-to-hydrogen conversion via urea electrolysis, *Energy Environ. Sci.* 11(2018) 1890.
- [6] V. Maruthapandian, S. Kumaraguru, S. Mohan, V. Saraswathy, S. Muralidharan. An Insight on the Electrocatalytic Mechanistic Study of Pristine Ni MOF(BTC) in Alkaline Medium for Enhanced OER and UOR, *ChemElectroChem* 5 (2018).
- [7] X. Wang, J. Wang, X. Sun, S. Wei, L. Cui, W. Yang, J. Liu, Hierarchical coral-like NiMoS nanohybrids as highly efficient bifunctional electrocatalysts for overall urea electrolysis, *Nano Res.* 11 (2018) 988-996.

- [8] S. Chen, J. Duan, A. Vasileff, S. Z. Qiao, Size Fractionation of Two-Dimensional Sub-Nanometer Thin Manganese Dioxide Crystals towards Superior Urea Electrocatalytic Conversion, *Angew. Chem. Int. Ed.* 55 (2016) 3804-3808.
- [9] Y. Chen, P. Sun, W. Xing, Cobalt nitride nanoflakes supported on Ni foam as a high-performance bifunctional catalyst for hydrogen production via urea electrolysis, *J. Chem. Sci.* 131 (2019) 101.
- [10] N. Muthuchamy, S. Jang, J. C. Park, S. Park, K. H. Park, Bimetallic NiPd Nanoparticle-Incorporated Ordered Mesoporous Carbon as Highly Efficient Electrocatalysts for Hydrogen Production via Overall Urea Electrolysis, *ACS Sustainable Chem. Eng.* 7 (2019) 15526-15536.
- [11] S. Chen, J. Duan, A. Vasileff, S. Z. Qiao, Size fractionation of two-dimensional sub-nanometer thin manganese dioxide crystals towards superior urea electrocatalytic conversion, *Angew. Chem. Int. Ed.* 55 (2016) 3804-3808.
- [12] X. Wang, J. Wang, X. Sun, S. Wei, L. Cui, W. Yang, J. Liu, Hierarchical coral-like NiMoS nanohybrids as highly efficient bifunctional electrocatalysts, *Nano Res.* 11(2018) 988.
